# Supplementary material for: Frequency and Determinants of Breastfeeding in Greece: A Prospective Cohort Study during the COVID-19 Pandemic
Source: MDPI journal article supplement (doi:10.3390/children9010043), 2022-01-02
Supplement: s1 [file s1]

**Table S1:** Logistic regression results for FBF in the first month. (Nagelkerke  $R^2=36.4$ )

| Variables                                | O.R.   | p-value | 95% C.I. for O.R. |         |
|------------------------------------------|--------|---------|-------------------|---------|
|                                          |        |         | Lower             | Upper   |
| Employment at sixth month after delivery | 5.922  | <0.001  | 4.133             | 8.485   |
| Type of hospital                         | 0.686  | 0.028   | 0.490             | 0.960   |
| Mode of delivery                         | 0.561  | 0.001   | 0.395             | 0.796   |
| BMI before pregnancy                     | 0.940  | <0.001  | 0.909             | 0.972   |
| Junior High/High School                  | 10.424 | 0.050   | 1.004             | 108.265 |
| College                                  | 16.692 | 0.019   | 1.602             | 173.903 |
| University                               | 22.824 | 0.008   | 2.229             | 233.728 |
| Postgraduate studies                     | 17.590 | 0.017   | 1.681             | 184.041 |
| Birth weight of the newborn <2500kg      | 0.257  | 0.005   | 0.100             | 0.662   |
| Previous breastfeeding experience (days) | 1.002  | <0.001  | 1.002             | 1.003   |

Note: the reference level for education is none/elementary school.

FBF: full breastfeeding

**Table S2:** Logistic regression results for FBF in the third month. (Nagelkerke  $R^2=41.2$ )

| Variables                                | O.R.   | p-value | 95% C.I. for O.R. |        |
|------------------------------------------|--------|---------|-------------------|--------|
|                                          |        |         | Lower             | Upper  |
| Previous breastfeeding experience (days) | 1.002  | <0.001  | 1.001             | 1.003  |
| Employment at sixth month after delivery | 12.864 | <0.001  | 8.210             | 20.159 |
| BMI before pregnancy                     | 0.930  | <0.001  | 0.897             | 0.963  |
| Mode of delivery                         | 0.585  | 0.004   | 0.407             | 0.840  |
| Prematurity                              | 0.481  | 0.069   | 0.219             | 1.059  |
| Marital status                           | 3.450  | 0.008   | 1.382             | 8.613  |
| Birth weight of the newborn <2500kg      | 0.288  | 0.023   | 0.098             | 0.842  |

FBF: full breastfeeding

**Table S3:** Logistic regression results for FBF in the sixth month. (Nagelkerke  $R^2=23.4$ )

| Variables                                | O.R.   | p-value | 95% C.I. for O.R. |        |
|------------------------------------------|--------|---------|-------------------|--------|
|                                          |        |         | Lower             | Upper  |
| Previous breastfeeding experience (days) | 1.002  | <0.001  | 1.002             | 1.003  |
| Employment at sixth month after delivery | 11.741 | 0.001   | 2.805             | 49.149 |

FBF: full breastfeeding

**Table S4:** Logistic regression results for ABF in the sixth month. (Nagelkerke  $R^2=65.7$ )

| Variables                                | O.R.    | p-value | 95% C.I. for O.R. |          |
|------------------------------------------|---------|---------|-------------------|----------|
|                                          |         |         | Lower             | Upper    |
| Employment at sixth month after delivery | 66.579  | <0.001  | 38.189            | 116.073  |
| BMI before pregnancy                     | 0.948   | 0.012   | 0.909             | 0.988    |
| Junior High/High School                  | 45.636  | 0.004   | 3.370             | 617.953  |
| College                                  | 54.590  | 0.003   | 4.008             | 743.598  |
| University                               | 109.635 | <0.001  | 8.150             | 1474.902 |
| Postgraduate studies                     | 210.877 | <0.001  | 14.874            | 2989.717 |

|                                          |       |        |       |       |
|------------------------------------------|-------|--------|-------|-------|
| Previous breastfeeding experience (days) | 1.004 | <0.001 | 1.003 | 1.006 |
|------------------------------------------|-------|--------|-------|-------|

*Note: the reference level for education is none/elementary school.*  
*ABF: any breastfeeding*

**Table S5:** Logistic regression results for BFWHMS in the sixth month. (Nagelkerke  $R^2=37.9$ )

| Variables                                | O.R.   | p-value | 95% C.I. for O.R. |        |
|------------------------------------------|--------|---------|-------------------|--------|
|                                          |        |         | Lower             | Upper  |
| Employment at sixth month after delivery | 31.595 | <0.001  | 15.798            | 63.191 |
| Type of hospital                         | 0.542  | 0.001   | 0.383             | 0.767  |
| Marital status                           | 3.326  | 0.021   | 1.197             | 9.247  |
| Mode of delivery                         | 0.612  | 0.007   | 0.428             | 0.874  |
| BMI before pregnancy                     | 0.950  | 0.007   | 0.916             | 0.986  |
| Birth weight of the newborn <2500kg      | 0.187  | 0.003   | 0.062             | 0.560  |

BFWHMS: breastfeeding without human-milk substitute

**Table S6:** Employment at six months in association with ABF.

|                          |                                               | ABF                    |                              | Total |
|--------------------------|-----------------------------------------------|------------------------|------------------------------|-------|
|                          |                                               | Women who followed ABF | Women who did not follow ABF |       |
| Employment at six months | Yes                                           | 21                     | 285                          | 306   |
|                          | No (Household/Unemployed)                     | 99                     | 72                           | 171   |
|                          | No (Maternity Leave)                          | 127                    | 25                           | 152   |
|                          | No (Work suspension due to COVID-19 pandemic) | 83                     | 2                            | 85    |
|                          | No (Teleworking due to COVID-19 pandemic)     | 124                    | 8                            | 132   |
| Total                    |                                               | 454                    | 392                          | 846   |

Chi-square test: p-value<0.001  
ABF: any breastfeeding

**Table S7:** Employment at six months in association with FBF.

|                          |                                               | FBF                    |                              | Total |
|--------------------------|-----------------------------------------------|------------------------|------------------------------|-------|
|                          |                                               | Women who followed FBF | Women who did not follow FBF |       |
| Employment at six months | Yes                                           | 2                      | 304                          | 306   |
|                          | No (Household/Unemployed)                     | 13                     | 158                          | 171   |
|                          | No (Maternity Leave)                          | 1                      | 151                          | 152   |
|                          | No (Work suspension due to COVID-19 pandemic) | 30                     | 55                           | 85    |
|                          | No (Teleworking due to COVID-19 pandemic)     | 15                     | 118                          | 133   |
| Total                    |                                               | 61                     | 786                          | 847   |

Chi-square test: p-value<0.001  
FBF: full breastfeeding

**Table S8:** Employment at six months in association with BFWHMS.

|                                                     |                                                |       | BFWHMS                    |                                 | Total |
|-----------------------------------------------------|------------------------------------------------|-------|---------------------------|---------------------------------|-------|
|                                                     |                                                |       | Women who followed BFWHMS | Women who did not follow BFWHMS |       |
| Employment at six months                            | Yes                                            | Count | 9                         | 297                             | 306   |
|                                                     | No (Household/Unemployed)                      | Count | 62                        | 109                             | 171   |
|                                                     | No (Maternity Leave)                           | Count | 79                        | 73                              | 152   |
|                                                     | No (Work suspension due to COVID-19 pandemic ) | Count | 35                        | 50                              | 85    |
|                                                     | No (Teleworking due to COVID-19 pandemic)      | Count | 78                        | 54                              | 132   |
|                                                     | Total                                          | Count | 263                       | 583                             | 846   |
| Chi-square test: p-value<0.001                      |                                                |       |                           |                                 |       |
| BFWHMS: breastfeeding without human-milk substitute |                                                |       |                           |                                 |       |

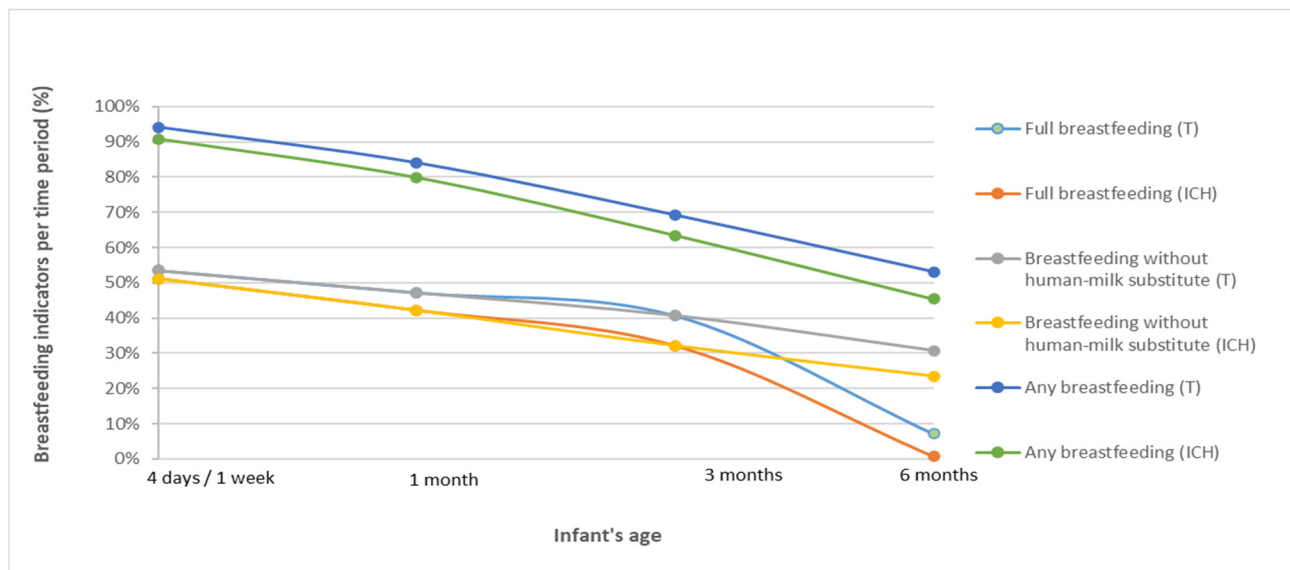

**Figure S1.** Comparison between the present and the latest national study on breastfeeding indicators per time period.

T: Tigka et al. (present study); ICH: Institute of Child Health (Latest National Study)
